# Supplementary material for: Strategies of entrepreneurship : Understanding industrial entrepreneurship and structural change in northwest Tanzania
Source: JCI journal article supplement (doi:10.1172/jci68993), 1997-01-01
Supplement: sd1 [file 1]

### Supplemental methods

On prescribed time points ( $t=0$ ,  $t=20$ ,  $t=40$ ,  $t=60$ ,  $t=90$ ,  $t=120$ ,  $t=180$ ,  $t=240$ ,  $t=300$  and  $t=360$ ) after entering the cold room, subjects completed visual analogue scales (VAS-scales), on sensation, thermal comfort and shivering (**Supplemental Figure 1**). On the scale they were asked to indicate their sensation (How are you feeling now?), their comfort (Do you think this is...?) and shivering was reported (Are you shivering?). The scores were transferred to numeric data (from 0-10 for sensation, from -3.1 to -0.1 and 0.1 to 3.1 for comfort and 0-10 for shivering), so that analyses could be done. Incremental area under the curve was calculated for day 3 (6 hours) and day 10 (6 hours) and these values were compared by means of a paired sample t test.

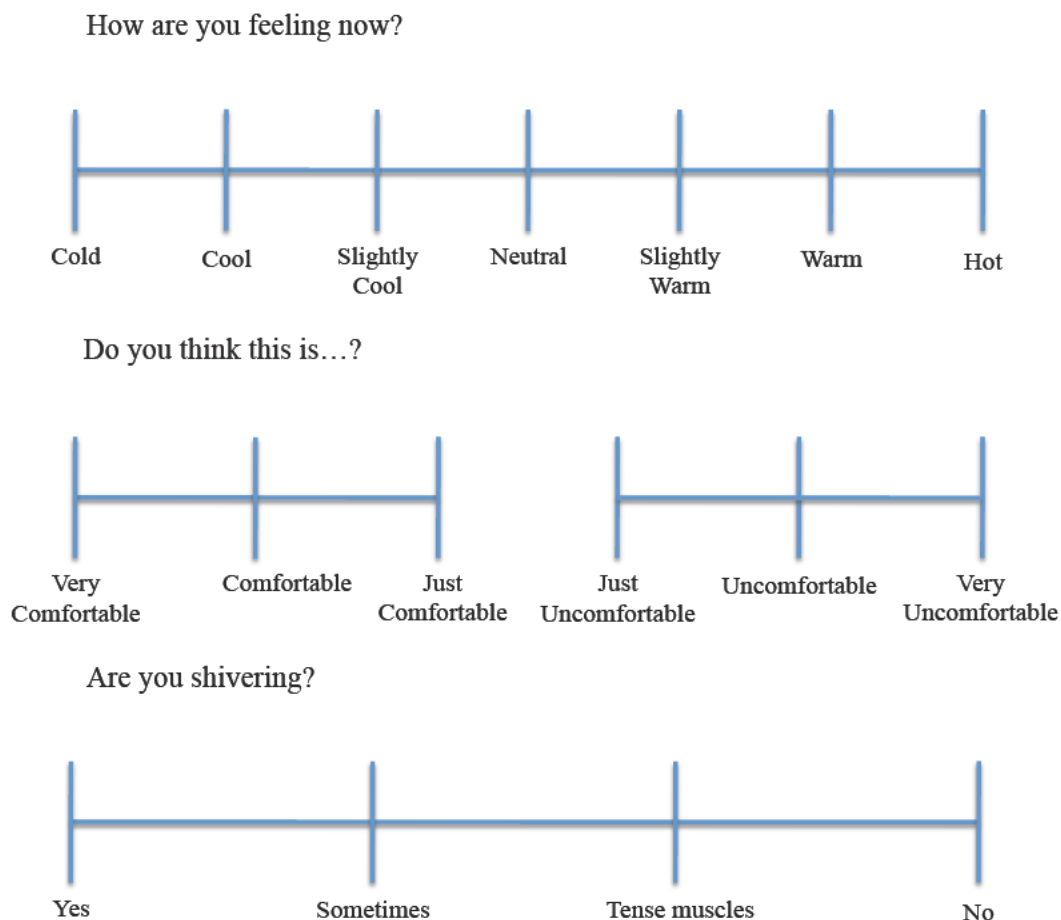

**Supplemental Figure 1:** Visual representation of the VAS-scales on sensation, overall comfort and shivering. The questionnaires were presented in either Dutch or English to the subjects through an Internet browser.

mRNA expression levels of several markers were measured both in subcutaneous white fat samples and in skeletal muscle material. No effect of the cold acclimation was found in fat tissue, however PPARgamma and adiponectin were up regulated in the skeletal muscle. The following Real-Time RT-PCR Primer Sequences were used;

**Supplemental Table 1: Real-Time-RT-PCR Primer Sequences used for gene expression in both skeletal muscle and white adipose tissue.**

| Genes               | Sequences                                         |
|---------------------|---------------------------------------------------|
| <b>hUCP1</b>        | AGGTCCAAGGTGAATGCC<br>GCGGTGATTGTTCCAGGA          |
| <b>hCIDEA</b>       | TCCGGGTCTCCAACCATGA<br>GGCATCCAGAGTCTTGCTGAT      |
| <b>hPRDM16</b>      | AGACTTCGGATGGGAGCAAAT<br>TCCACGCAGAACTTCTCACTG    |
| <b>hPGC1a</b>       | TCTGAGTCTGTATGGAGTGACAT<br>CCAAGTCGTTACATCTAGTTCA |
| <b>hAP2</b>         | ACTGGGCCAGGAATTTGACG<br>CCCCATCTAAGGTTATGGTGCTC   |
| <b>hPPARgamma</b>   | ACCAAAGTGCAATCAAAGTGGA<br>AGGCTTATTGTAGAGCTGAGTCT |
| <b>hAdiponectin</b> | TATCCCCAACATGCCCATTCG<br>TAGGCAAAGTAGTACAGCCCA    |
| <b>hAdipsin</b>     | GACACCATCGACCACGACC<br>GCCACGTCGCAGAGAGTTC        |
| <b>hLeptin</b>      | TGCCTTCCAGAAACGTGATCC<br>CTCTGTGGAGTAGCCTGAAGC    |
| <b>hFNDC5</b>       | AAGCACAAGGACTGACTCAAGC<br>CATGTCCTTGATGGCTGGAT    |
| <b>hTMEM26</b>      | ATGGAGGGACTGGTCTTCCTT<br>CTTACCTCGGTCACCTCGC      |
| <b>hCD137</b>       | AGCTGTTACAACATAGTAGCCAC<br>TCCTGCAATGATCTTGTCTCT  |
| <b>hTBP</b>         | CCACTCACAGACTCTCACAAAC<br>CTGCGGTACAATCCCAGAACT   |
| <b>hPPIA</b>        | TGGTGTTTGGCAAAGTGAAA<br>TCGAGTTGTCCACAGTCAGC      |
| <b>hB2M</b>         | GTGCTCGCGCTACTCTCTCT<br>TCTCTGCTGGATGACGTGAG      |

**Supplemental Table 2: mRNA expression in skeletal muscle and white adipose tissue.**

|                    | SKELETAL MUSCLE |              | WAT         |             |
|--------------------|-----------------|--------------|-------------|-------------|
|                    | PRE             | POST         | PRE         | POST        |
| <b>UCP1</b>        | 1.14 ± 0.61     | 1.37 ± 0.83  | 0.79 ± 0.71 | 0.61 ± 0.56 |
| <b>CIDEA</b>       | 1.12 ± 0.67     | 1.10 ± 0.79  | 1.13 ± 0.50 | 1.23 ± 0.66 |
| <b>PRDM16</b>      | 1.14 ± 0.43     | 1.45 ± 1.01  | 1.06 ± 0.29 | 0.97 ± 0.27 |
| <b>PGC1a</b>       | 1.03 ± 0.25     | 1.14 ± 0.37  | 1.11 ± 0.49 | 0.98 ± 0.33 |
| <b>AP2</b>         | 1.03 ± 0.25     | 1.03 ± 0.39  | 1.06 ± 0.34 | 1.04 ± 0.32 |
| <b>PPARgamma</b>   | 1.03 ± 0.25     | 1.19 ± 0.34* | 1.06 ± 0.32 | 1.11 ± 0.23 |
| <b>ADIPONECTIN</b> | 1.07 ± 0.71     | 1.76 ± 1.42* | 1.07 ± 0.38 | 0.98 ± 0.17 |
| <b>ADIPSIN</b>     | 1.08 ± 0.40     | 1.00 ± 0.43  | 1.09 ± 0.37 | 1.10 ± 0.31 |
| <b>LEPTIN</b>      | 1.08 ± 0.44     | 1.38 ± 0.91  | 1.16 ± 0.51 | 1.07 ± 0.73 |
| <b>FNDC5</b>       | 1.04 ± 0.30     | 0.97 ± 0.35  | 1.04 ± 0.19 | 1.06 ± 0.34 |
| <b>TMEM26</b>      | 1.10 ± 0.38     | 1.02 ± 0.40  | 1.12 ± 0.44 | 1.31 ± 0.46 |
| <b>CD137</b>       | 1.20 ± 0.76     | 1.58 ± 1.08  | 1.12 ± 0.83 | 0.80 ± 0.45 |

Results are expressed as means ± SD. \* p<0.05 PRE vs. POST. All expression levels are normalized to the average of all subjects PRE cold. The effect of the cold acclimation was tested with a paired samples t test.
